# Supplementary material for: Understanding the electrochemical properties of bulk phase and surface structures of Na3TMPO4CO3(TM= Fe, Mn, Co, Ni) from first principles calculations
Source: Royal Society of Chemistry journal article supplement (doi:10.1039/d0cp01355b), 2020-01-01
Supplement: d0cp01355b1.pdf [file d0cp01355b1.pdf]

## Supporting information

of

### Understanding the electrochemical properties of bulk phase and surface structures of $\text{Na}_3\text{T}^M\text{PO}_4\text{CO}_3$ ( $\text{T}^M = \text{Fe}, \text{Mn}, \text{Co}, \text{Ni}$ ) from first principles calculations

Yuhan Li,<sup>ab</sup> Shuwei Tang,<sup>\*bc</sup> Jingping Zhang,<sup>\*b</sup> Koichi Yamashita<sup>d</sup> and Lei Ni<sup>a</sup>

<sup>a</sup> College of Science, Beihua University, Jilin, Jilin 132013, China.

<sup>b</sup> Institute of Functional Material Chemistry, Faculty of Chemistry, Northeast Normal University, Changchun, Jilin 130024, China.

<sup>c</sup> Institute of mineral Materials and Clean Transformation, College of Materials Science and Engineering, Liaoning Technical University, Fuxin, Liaoning, 123000, China.

<sup>d</sup> Department of Chemical System Engineering, School of Engineering, the University of Tokyo, Tokyo, 113-8656, Japan.

Corresponding authors:

Shuwei Tang, E-mail: tangsw911@nenu.edu.cn

Jingping Zhang, jpzhang@nenu.edu.cn

## Table of Contents

|                                                                                                                                    |     |
|------------------------------------------------------------------------------------------------------------------------------------|-----|
| 1. Table S1. Calculated $E_{FM}-E_{AFM}$ for $Na_xT^MPO_4CO_3$ compounds.....                                                      | S3  |
| 2. Table S2. Relaxed parameters and calculated results for surface structures of $Na_3MnPO_4CO_3$ in all orientations.....         | S4  |
| 3. Fig. S1 Calculated crystal structure of (a) $Na_2T^MPO_4CO_3$ and (b) $Na_1T^MPO_4CO_3$ ( $T^M = Fe, Mn, Co$ and $Ni$ ). .....  | S5  |
| 4. Fig. S2 Calculated local density of states of (a) $Na_3T^MPO_4CO_3$ and (b) $Na_2T^MPO_4CO_3$ ( $T^M = Fe, Mn, Co, Ni$ ). ..... | S6  |
| 5. Table S3 Calculated average Bader charges for $Na_xT^MPO_4CO_3$ ( $x = 0, 0.5, 1.0, 1.5, 2, 2.5, 3.0$ ) .....                   | S7  |
| 6. Table S4 Calculated $C_{11}, C_{22}, C_{33}$ , and eigenvalues of the elastic stiffness matrixes for $Na_xT^MPO_4CO_3$ .....    | S8  |
| 7. Table S5 Coordination number of Mn and Na ions located in the outmost layers of the surfaces.....                               | S10 |

Table S1. Calculated  $E_{FM}-E_{AFM}$  for  $Na_xT^MPO_4CO_3$  compounds

| $E_{FM}-E_{AFM}$ | Fe     | Mn     | Co    | $E_{FM}-E_{AFM}$ | Ni     |
|------------------|--------|--------|-------|------------------|--------|
| x = 3            | 0.001  | 0.001  | 0.108 | x = 3            | 0.000  |
| x = 2            | 0.003  | -0.002 | 0.009 | x = 2            | -0.007 |
| x = 1            | 0.005  | -0.004 | 0.010 | x = 1.5          | -0.011 |
| x = 0.5          | 0.005  | -0.026 | 0.004 | x = 1            | -0.056 |
| x = 0            | -0.011 | 0.022  | 0.014 | x = 0.5          | 0.015  |
|                  |        |        |       | x = 0            | -0.036 |

Table S2. Relaxed parameters and calculated results for surface structures of  $\text{Na}_3\text{MnPO}_4\text{CO}_3$  in all orientations

| Orientation | Slab (Å) | Relaxation Layer (Å) | Low-energy Termination        | Surface Energy (J/m <sup>2</sup> ) | High-energy Termination | Surface Energy (J/m <sup>2</sup> ) |
|-------------|----------|----------------------|-------------------------------|------------------------------------|-------------------------|------------------------------------|
| (1 0 0)     | 27.2     | 9.0                  | (0, 0, 0)                     | 1.19                               | (0.5, 0, 0)             | 1.60                               |
| (0 1 0)     | 20.5     | 6.8                  | (0, 0, 0) and /or (0, 0.5, 0) | 0.35                               | ---                     | ---                                |
| (0 0 1)     | 15.7     | 5.2                  | (0, 0, 0)                     | 0.44                               | (0, 0, 0.5)             | 0.78                               |
| (0 1 1)     | 12.5     | 4.2                  | (0, 0, 0)                     | 0.78                               | (0, 0, 0.5)             | 0.92                               |
| (1 1 0)     | 16.4     | 5.5                  | (0, 0, 0)                     | 0.56                               | (0.5, 0, 0)             | 0.68                               |
| (1 0 1)     | 13.7     | 4.6                  | (0.5, 0, 0)                   | 0.61                               | (0, 0, 0)               | 1.02                               |
| (-1 0 1)    | 13.6     | 4.5                  | (0, 0, 0.5)                   | 0.69                               | (0, 0, 0)               | 0.96                               |
| (1 1 1)     | 11.4     | 3.8                  | (0, 0, 0)                     | 0.51                               | (0.5, 0, 0)             | 0.72                               |
| (1 2 -1)    | 13.6     | 4.6                  | (0.5, 0, 0)                   | 0.61                               | (0, 0, 0)               | 0.86                               |

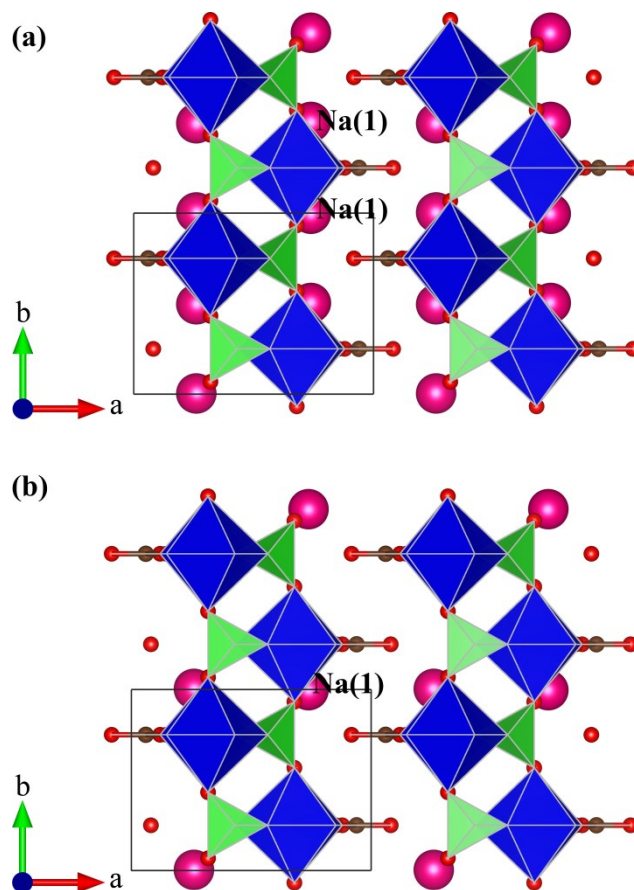

Fig. S1 Calculated crystal structure of (a)  $\text{Na}_2\text{T}^M\text{PO}_4\text{CO}_3$  and (b)  $\text{Na}_1\text{T}^M\text{PO}_4\text{CO}_3$  ( $\text{T}^M = \text{Fe}, \text{Mn}, \text{Co}$  and  $\text{Ni}$ ). (Na atoms, O atoms and C atoms are figured in pink, red and brown, respectively.  $\text{PO}_4$  and  $\text{T}^M\text{O}_6$  are drawn in green and blue, respectively)

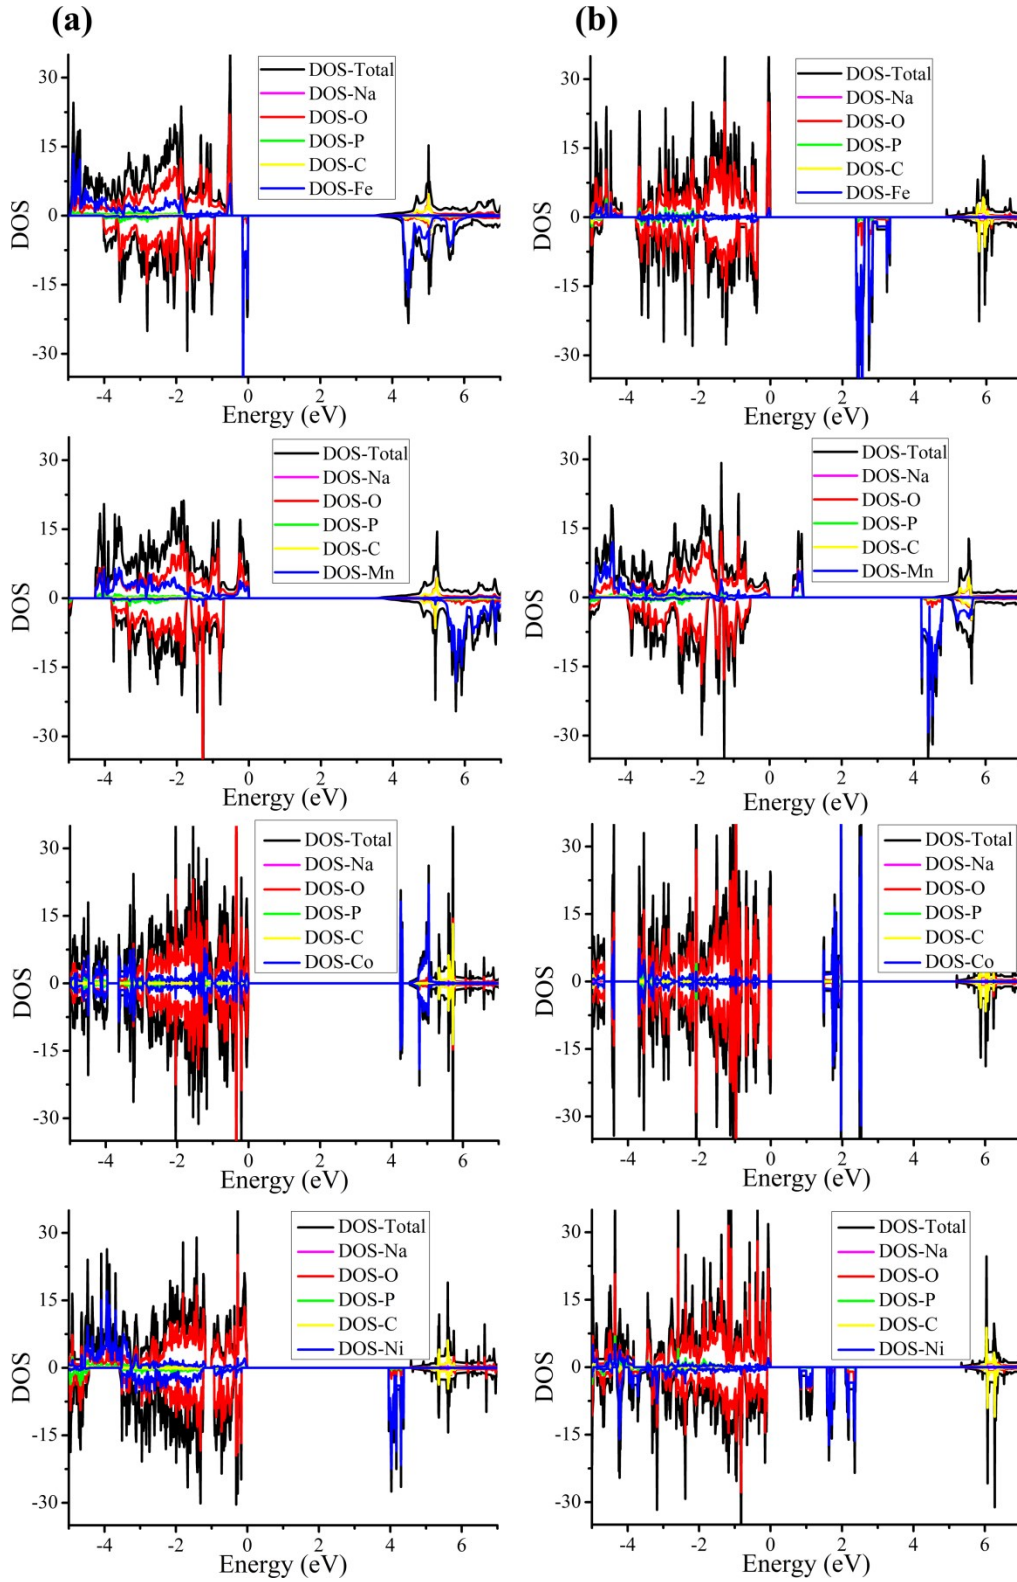

Fig. S2 Calculated local density of states of (a)  $\text{Na}_3\text{T}^{\text{M}}\text{PO}_4\text{CO}_3$  and (b)  $\text{Na}_2\text{T}^{\text{M}}\text{PO}_4\text{CO}_3$  ( $\text{T}^{\text{M}} = \text{Fe}, \text{Mn}, \text{Co}, \text{Ni}$ ).

Table S3 Calculated average Bader charges for  $\text{Na}_x\text{T}^{\text{M}}\text{PO}_4\text{CO}_3$  ( $x = 0, 0.5, 1.0, 1.5, 2, 2.5, 3.0$ )

| <b>x</b> | <b>Na</b> | <b>O</b> | <b>P</b> | <b>C</b> | <b>Fe</b> |
|----------|-----------|----------|----------|----------|-----------|
| 0        |           | -1.13    | 3.76     | 2.23     | 1.95      |
| 0.5      | 0.90      | -1.20    | 3.75     | 2.25     | 1.95      |
| 1        | 0.90      | -1.26    | 3.74     | 2.25     | 1.93      |
| 2        | 0.89      | -1.37    | 3.72     | 2.20     | 1.90      |
| 3        | 0.88      | -1.42    | 3.70     | 2.16     | 1.45      |
| <b>x</b> | <b>Na</b> | <b>O</b> | <b>P</b> | <b>C</b> | <b>Mn</b> |
| 0        |           | -1.13    | 3.75     | 2.20     | 1.96      |
| 0.5      | 0.91      | -1.19    | 3.74     | 2.20     | 1.94      |
| 1        | 0.91      | -1.25    | 3.73     | 2.21     | 1.92      |
| 2        | 0.89      | -1.35    | 3.71     | 2.22     | 1.77      |
| 3        | 0.88      | -1.43    | 3.70     | 2.16     | 1.52      |
| <b>x</b> | <b>Na</b> | <b>O</b> | <b>P</b> | <b>C</b> | <b>Co</b> |
| 0        |           | -1.11    | 3.75     | 2.24     | 1.77      |
| 0.5      | 0.90      | -1.17    | 3.74     | 2.25     | 1.75      |
| 1        | 0.90      | -1.23    | 3.73     | 2.25     | 1.73      |
| 2        | 0.89      | -1.34    | 3.72     | 2.20     | 1.71      |
| 3        | 0.88      | -1.41    | 3.70     | 2.15     | 1.35      |
| <b>x</b> | <b>Na</b> | <b>O</b> | <b>P</b> | <b>C</b> | <b>Ni</b> |
| 0        |           | -1.09    | 3.75     | 2.24     | 1.61      |
| 0.5      | 0.90      | -1.12    | 3.75     | 2.25     | 1.41      |
| 1        | 0.90      | -1.18    | 3.74     | 2.25     | 1.40      |
| 1.5      | 0.89      | -1.24    | 3.72     | 2.25     | 1.39      |
| 2        | 0.89      | -1.32    | 3.71     | 2.25     | 1.50      |
| 3        | 0.88      | -1.40    | 3.70     | 2.16     | 1.32      |

Standard deviation: Na, P, C: < 0.005; T<sup>M</sup>: < 0.02; O: < 0.2

Table S4 Calculated  $C_{11}$ ,  $C_{22}$ ,  $C_{33}$ , and eigenvalues of the elastic stiffness matrixes for  $\text{Na}_x\text{T}^{\text{M}}\text{PO}_4\text{CO}_3$

| Fe           | x=3   | x=2   | x=1   | x=0.5 | x=0   |       |
|--------------|-------|-------|-------|-------|-------|-------|
| Eigenvalue 1 | 199.3 | 166.2 | 97.9  | 98.4  | 88.5  |       |
| Eigenvalue 2 | 84.2  | 71.9  | 47.1  | 35.3  | 35.3  |       |
| Eigenvalue 3 | 65.4  | 51.0  | 33.7  | 15.6  | 9.3   |       |
| Eigenvalue 4 | 27.5  | 16.8  | 16.7  | 12.2  | 6.5   |       |
| Eigenvalue 5 | 16.1  | 15.7  | 4.9   | 4.1   | 4.3   |       |
| Eigenvalue 6 | 10.6  | 11.3  | 4.2   | 2.2   | 3.1   |       |
| $C_{11}$     | 135.9 | 80.5  | 38.8  | 13.0  | 6.9   |       |
| $C_{22}$     | 119.4 | 140.8 | 93.6  | 96.5  | 88.4  |       |
| $C_{33}$     | 91.5  | 66.0  | 41.6  | 35.2  | 33.6  |       |
| Mn           | x=3   | x=2   | x=1   | x=0.5 | x=0   |       |
| Eigenvalue 1 | 183.8 | 142.5 | 154.4 | 161.2 | 178.8 |       |
| Eigenvalue 2 | 73.7  | 52.3  | 68.7  | 57.3  | 41.8  |       |
| Eigenvalue 3 | 58.0  | 27.3  | 43.2  | 22.9  | 14.5  |       |
| Eigenvalue 4 | 26.5  | 21.6  | 19.5  | 16.4  | 8.7   |       |
| Eigenvalue 5 | 23.2  | 19.2  | 10.6  | 12.7  | 4.5   |       |
| Eigenvalue 6 | 7.8   | 14.9  | 7.5   | 6.6   | 1.7   |       |
| $C_{11}$     | 129.5 | 78.4  | 57.8  | 34.4  | 4.5   |       |
| $C_{22}$     | 101.4 | 72.2  | 142.0 | 160.6 | 178.8 |       |
| $C_{33}$     | 82.4  | 68.8  | 60.0  | 45.1  | 40.7  |       |
| Co           | x=3   | x=2   | x=1   | x=0.5 | x=0   |       |
| Eigenvalue 1 | 197.9 | 183.1 | 97.7  | 111.4 | 93.0  |       |
| Eigenvalue 2 | 77.1  | 73.8  | 49.7  | 29.0  | 39.8  |       |
| Eigenvalue 3 | 63.5  | 60.4  | 38.1  | 17.8  | 15.6  |       |
| Eigenvalue 4 | 32.5  | 18.6  | 11.1  | 11.9  | 11.9  |       |
| Eigenvalue 5 | 26.3  | 14.4  | 3.7   | 6.8   | 6.3   |       |
| Eigenvalue 6 | 10.0  | 12.3  | 1.6   | 2.7   | 5.9   |       |
| $C_{11}$     | 133.3 | 90.2  | 43.0  | 19.1  | 21.1  |       |
| $C_{22}$     | 103.2 | 151.3 | 92.4  | 110.0 | 92.1  |       |
| $C_{33}$     | 99.4  | 74.5  | 42.7  | 25.2  | 35.1  |       |
| Ni           | x=3   | x=2   | x=1.5 | x=1   | x=0.5 | x=0   |
| Eigenvalue 1 | 207.1 | 165.5 | 109.3 | 92.0  | 76.5  | 114.5 |
| Eigenvalue 2 | 81.3  | 72.7  | 56.3  | 54.6  | 27.8  | 39.6  |



---

|                 |       |       |      |      |      |       |
|-----------------|-------|-------|------|------|------|-------|
| Eigenvalue 3    | 72.4  | 58.5  | 45.9 | 22.6 | 12.8 | 15.8  |
| Eigenvalue 4    | 35.8  | 24.7  | 20.6 | 10.2 | 10.7 | 8.5   |
| Eigenvalue 5    | 28.4  | 16.6  | 13.4 | 6.4  | 4.2  | 7.6   |
| Eigenvalue 6    | 12.1  | 13.9  | 10.5 | 5.8  | 2.9  | 5.9   |
| C <sub>11</sub> | 142.7 | 91.2  | 60.6 | 37.9 | 11.9 | 18.2  |
| C <sub>22</sub> | 109.8 | 127.4 | 84.5 | 87.1 | 72.8 | 113.9 |
| C <sub>33</sub> | 106.7 | 77.9  | 65.0 | 43.0 | 29.8 | 37.5  |

---

Table S5 Coordination number of Mn and Na ions located in the outmost layers of the surfaces

| Surface | Label | Coordination number <sup>a</sup> | Surface | Label | Coordination number <sup>a</sup> |
|---------|-------|----------------------------------|---------|-------|----------------------------------|
| 100     | Na(1) | 2-2                              | 101     | Na(1) | 3-4                              |
|         | Na(2) | 5-5                              |         | Na(2) | 3-4                              |
|         | Na(3) | 5-5                              |         | Na(3) | 4-4                              |
|         | Mn(1) | 6-6                              |         | Mn(1) | 5-5                              |
| 010     | Na(1) | 3-3                              | -101    | Na(1) | 2-4                              |
|         | Mn(1) | 5-5                              |         | Na(2) | 5-5                              |
| 001     | Na(1) | 4-5                              |         | Na(3) | 5-5                              |
|         | Na(2) | 4-5                              | Na(4)   | 5-6   |                                  |
|         | Na(3) | 4-4                              | Na(5)   | 5-6   |                                  |
|         | Mn(1) | 5-5                              | Mn(1)   | 3-4   |                                  |
| 110     | Na(1) | 6-6                              | 111     | Na(1) | 4-4                              |
|         | Na(2) | 5-5                              |         | Na(2) | 3-4                              |
|         | Na(3) | 4-5                              |         | Na(3) | 5-5                              |
|         | Mn(1) | 3-5                              |         | Na(4) | 5-5                              |
| 011     | Na(1) | 4-4                              |         | Mn(1) | 4-4                              |
|         | Na(2) | 5-5                              | 12-1    | Na(1) | 3-3                              |
|         | Na(3) | 5-5                              |         | Na(2) | 4-4                              |
|         | Mn(1) | 5-5                              |         | Na(3) | 4-4                              |
|         | Mn(3) | 5-5                              |         | Mn(1) | 5-5                              |
|         |       |                                  |         | Mn(2) | 4-4                              |

<sup>a</sup> Coordination of atoms in unrelaxed surface structures - Coordination of atoms in relaxed surface structures
